# 1      **Genome assembly of the maize inbred line A188 provides a new** 2      **reference genome for functional genomics**

3      Fei Ge<sup>1#</sup>, Jingtao Qu<sup>1#</sup>, Peng Liu<sup>1#</sup>, Lang Pan<sup>1#</sup>, Chaoying Zou, Guangsheng Yuan<sup>1</sup>, Cong Yang<sup>1</sup>,

4      Shibin Gao<sup>1</sup>, Guangtang Pan<sup>1</sup>, Jianwei Huang<sup>2</sup>, Langlang Ma<sup>1\*</sup>, Yaou Shen<sup>1\*</sup>

5      <sup>1</sup> Key Laboratory of Biology and Genetic Improvement of Maize in Southwest Region, Maize Research Institute,  
6      Sichuan Agricultural University, Chengdu, 611130, China

7      <sup>2</sup>Berry Genomics Corporation, Beijing, 100015, China

8      <sup>#</sup> These authors contributed equally to this work

9      <sup>\*</sup> Corresponding authors:

10      Langlang Ma, email: sxyljxml@163.com

11      Yaou Shen, email: shenyaou@sicau.edu.cn

## 12      **Highlight**

13      Our manuscript presents a high-quality reference genome of the inbred line A188, and  
14      provides new insights into candidate genes underlying maize embryonic callus  
15      induction and other maize agronomic traits.

## 16      **Abstract**

17      Heretofore, little is known about the mechanism underlying the genotype-dependence  
18      of embryonic callus (EC) induction, which has severely inhibited the development of  
19      maize genetic engineering. Here, we report the genome sequence and annotation of a  
20      maize inbred line with high EC induction ratio, A188, which is assembled from  
21      single-molecule sequencing and optical genome mapping. We assembled a 2,210 Mb  
22      genome with a scaffold N50 size of 11.61 million bases (Mb), compared to those of  
23      9.73 Mb for B73 and 10.2 Mb for Mo17. Comparative analysis revealed that ~30% of  
24      the predicted A188 genes had large structural variations to B73, Mo17 and W22

1 genomes, which caused considerable protein divergence and might lead to phenotypic  
2 variations between the four inbred lines. Combining our new A188 genome,  
3 previously reported QTLs and RNA sequencing data, we reveal 8 large structural  
4 variation genes and 4 differentially expressed genes playing potential roles in EC  
5 induction.

## 6 **Keywords**

7 Maize, Embryonic callus, A188, Single-molecule sequencing, RNA sequencing,  
8 Genome assembly

## 9 **Introduction**

10 Genetic transformation has been an effective approach for elucidating gene functions  
11 in plants. Maize (*Zea mays* L.) genetic transformation is highly relied on the  
12 utilization of embryonic callus (EC) induced from immature embryos. However, only  
13 a few lines possess the ability to efficiently form embryonic callus, including several  
14 inbred lines as A188, B104, H99, C01 and the combination Hi-II (A×B) etc.  
15 (Armstrong *et al.*, 1992; Bronsema *et al.*, 1997; Krakowsky *et al.*, 2006; Salvo *et al.*,  
16 2018). Since the plant regeneration from maize tissue culture was firstly reported in  
17 1975 (Green and Phillips, 1975), little is known about how the maize EC was induced  
18 from the immature embryos even though great efforts have been made by generation  
19 to generation of researchers (Armstrong *et al.*, 1992; Krakowsky *et al.*, 2006; Pan *et*  
20 *al.*, 2006; Salvo *et al.*, 2018). To date, only several QTLs were identified involved in  
21 controlling callus induction or plant regeneration.

22 Using an F<sub>2</sub> population derived from two inbred lines with divergent EC

1 induction rate, Pan *et al.* mapped 5 QTLs for tissue culture response on chromosome  
2 1, 3, 7 and 8, respectively (Pan *et al.*, 2006). Similarly, several type I callus formation  
3 related QTLs were identified using an F<sub>6</sub> RIL population constructed from H99 and  
4 Mo17 (Krakowsky *et al.*, 2006). More QTLs responsible for plantlets and  
5 transformation were identified using a segregation population constructed from  
6 FBLL×Hi-II (Lowe *et al.*, 2006). Armstrong *et al.* used a low frequency of EC  
7 initiation line B73 to backcross a high tissue culture response line A188, generating  
8 the BC<sub>6</sub>S<sub>4</sub> lines with high frequency of EC initiation (Armstrong *et al.*, 1992). Five  
9 introgressed A188 segments were identified correlating with EC formation  
10 (Armstrong *et al.*, 1992), and 4 markers located in or near the introgressed A188  
11 segments were found involving EC formation using an F<sub>2</sub> population of A188×Mo17  
12 (Armstrong *et al.*, 1992). Similarly, a B73 Near isogenic line WCIC2 (Donor parent:  
13 A188) with high frequency of EC initiation was used to genetically fine-map the  
14 QTLs for EC response, finally, a QTL located within a 3.06 Mb region on  
15 chromosome 3 was identified to control EC formation and regeneration (Salvo *et al.*,  
16 2018). Through reverse genetics, two genes, *ZmWUS2* and *ZmBBM*, were proved to  
17 regulate maize EC formation and regeneration. Overexpression of the two genes  
18 resulted in the improved frequencies of EC induction and transformation in both  
19 immature embryos and mature explants of the inbred lines with low tissue culture  
20 response (Lowe *et al.*, 2016). However, few of genes responsible for tissue culture  
21 response were cloned in maize.

22 Maize shows remarkable genomic diversity among various inbred lines (Buckler

1 *et al.*, 2006; Lai *et al.*, 2010; Schnable *et al.*, 2009; Springer *et al.*, 2009). The  
2 temperate line A188 (Gacheri *et al.*, 2015), with high frequency of EC initiation  
3 (Armstrong *et al.*, 1992; Salvo *et al.*, 2018), is a desirable material to study the  
4 molecular mechanism underlying EC formation and regeneration. Due to the  
5 difference between A188 genome and B73 reference genome, these identified QTLs  
6 for embryo culture response have not been cloned so far, limiting their applications in  
7 improving EC formation capability. In addition, A188 shows considerable phenotypic  
8 variations from other inbred lines, such as plant height (Peiffer *et al.*, 2014), ear  
9 height, days to tassel (Peiffer *et al.*, 2014), days to silk (Peiffer *et al.*, 2014), oil  
10 concentration (Cook *et al.*, 2011), protein concentration (Cook *et al.*, 2011), starch  
11 concentration (Cook *et al.*, 2011) etc. (Table 1). Collectively, the assembly of a  
12 high-quality A188 reference genome is helpful to reveal the molecular mechanism  
13 underlying EC induction and other agronomic traits. Here we combine  
14 single-molecule sequencing and BioNano optical-mapping technologies to produce a  
15 *de novo* assembly of the A188 genome and provide these research communities with  
16 an excellent resource.

## 17 **Methods**

18 **Phenotypic evaluations of maize inbred line A188, B73, Mo17 and W22.** The  
19 maize (*Zea Mays* L.) inbred lines A188, B73, Mo17 and W22, provided by Maize  
20 Research Institute of Sichuan Agricultural University, were grown in Chengdu  
21 (Sichuan province, China, N30°67', E104°06') in 2018. All of the lines were planted  
22 in a randomized complete block design with three replicates and two rows per line. A

total of 14 plants were contained per row with the row length of 3 m and the row  
 ledge of 0.75 m. These materials were managed according to the standard cultivation  
 practices. At 10 days after pollination (DAP), the plant height and TBN were  
 measured as described previously (Brown *et al.*, 2011). The day duration from  
 seeding to half of the plants tasseled, pollinated and silked was recorded as days to  
 tassel, days to pollination and days to silk, respectively. The ear numbers were  
 counted at 30 DAPs. Three mature seeds of each inbred line were crushed and  
 subjected to the measurement of the protein concentration using the RAPID N  
 exceed® (Elementar, Straße 1 63505 Langenselbold, Germany) according to the  
 manufacturer's instructions.

Maize inbred lines A188, B73, Mo17 and W22 were planted in a greenhouse  
 (14/10 h light/dark, at 28°C and 70% relative humidity). Twelve days after  
 self-pollination, 108 immature embryos (with 1.2-1.5 mm in length) from each line  
 were collected, and evenly distributed among three Petri dishes containing the  
 modified N6 medium (Frame *et al.*, 2002) with scutellum upward to induce EC, with  
 three replicates. After aseptic incubation for 21 days in darkness at 28°C, we  
 investigated the EC induction ratio which was represented by (number of the  
 immature embryos successfully inducing EC/ number of inoculated immature  
 embryos)  $\times$  100%.

**Genomic DNA and total RNA isolation.** The plants of A188 were grown in a  
 greenhouse at 28 °C in a dark condition for 14 d. The yellow leaves of A188 seedlings  
 were isolated and frozen immediately in liquid nitrogen for extracting genomic DNA,

1 which was subsequently used for constructing libraries for PacBio sequencing and  
2 BioNano optical maps. To assist gene annotation and transcriptome analysis,  
3 transcriptome of five tissues were performed single-molecule long-read sequencing.

4 Total RNA was extracted from five tissues (12-d seedlings, tassel, silk, pericarp  
5 and 20-DAP seeds) with TRIzol reagent (Invitrogen, Carlsbad, CA) according to the  
6 manufacturer's instructions. For each sample, we generated three independent  
7 biological replicates. The same amount of RNAs (1 µg) for each replicate of each  
8 tissue were pooled and stored at -80 °C.

9 **PacBio library construction and sequencing.** Libraries for SMRT PacBio genome  
10 sequencing were constructed as previously reported (Pendleton *et al.*, 2015). Briefly,  
11 20 µg of high-quality genomic DNA was sheared, and the ~20 kb targeted size  
12 fragments were selected for ligation with SMRT adapter, followed by purification and  
13 size selection with Agilent 2100. The obtained PCR-free SMRTbell libraries were  
14 sequenced on the PacBio Sequel platform (Pacific Biosciences).

15 One microgram of enriched polyA RNA was reversely transcribed into cDNA by  
16 using the Clontech SMARTER cDNA synthesis kit, which was subjected to size  
17 selection using the BluePippin system. Size fractions eluted from the run were  
18 re-amplified to generate 2 libraries (0-1 kb and 1-10 kb). Then 2 µg cDNA of each  
19 library were subjected to Iso-Seq SMRTBell library construction according to the  
20 protocol reported on the website (<https://pacbio.secure.force.com/SamplePrep>). The  
21 SMRTBell libraries were then subjected to single-molecule sequencing on the PacBio  
22 Sequel platform (Pacific Biosciences).

1    **Optical library construction and sequencing.** The professional kit was used to  
 2    extract the High Molecular Weight (HMW) genome by agarose-embedded cells  
 3    followed by protein digestion. The HMW genome of the quality check-through was  
 4    specifically recognized by the *BspQ* I enzyme to identify the site to be labeled, and  
 5    the fluorescent group is added to the double-stranded DNA molecule by means of  
 6    modification and labeling, thereby ensuring the stability of the double strand and  
 7    increasing sequence tag density at the same time. Finally, DNA molecules with  
 8    fluorescent tags are stained to complete genome-specific tagging.

9        The marked library was loaded on the Irys chip for scanning and photographing.  
 10    During the whole process, images were continuously converted into map data. After  
 11    the real-time statistics and quality of Access reached the standard, the instrument was  
 12    stopped and the data was transferred to bioinformatics analysis.

13    ***De novo* assembly of PacBio SMRT reads.** After removing the short polymerase  
 14    reads, low quality polymerase reads and self-connected adaptor sequences,  
 15    27,248,178 subreads (approximately 224G) were used for contig assembly with  
 16    Falcon (Pendleton *et al.*, 2015). Firstly, all of the subreads were pairwise compared to  
 17    correct the error sequence with the parameters ‘--length\_cutoff 12000  
 18    --length\_cutoff\_pr 14000’, followed by preliminary assembly with parameters:  
 19    --min\_idt 0.70 --min\_cov 2 --max\_n\_read 200, and further error correction. The  
 20    overlap graphs were constructed with parameters ‘--max\_diff 100 --max\_cov 100  
 21    --min\_cov 2’, and then the contigs were assembled based on it. The Blasr (Chaisson  
 22    and Tesler, 2012) was employed to map all the subreads back to the contigs with the

parameters ‘--bestn 1 --maxScore -1000 --hitPolicy randombest’. We further performed assembly error corrections using Arrow (<https://github.com/PacificBiosciences/GenomicConsensus/>) with default parameters.

**Construction of BioNano optical maps.** High-molecular-weight DNA was digested by the endonuclease BspQI and then labeled with IrysPrep Labeling mix and Taq polymerase according to standard BioNano protocols. The BioNano raw data was filtered using Bionano Access (version 1.0.3), generating high quality data. Then the BioNano Irys system was subsequently used to automatically image the labeled DNA. IrysSolve (<https://bionanogenomics.com/support/software-downloads/>) was used to *de novo* assemble the BioNano bnx files into genome maps. The RefAligner (<https://bionanogenomics.com/support/software-downloads/>) was used for molecule Pairwise comparison to identify overlaps, followed by construction of consensus maps. We recursively refined and extended the consensus maps by mapping all molecules back to the consensus maps.

**Hybrid assembly of PacBio contigs and BioNano optical maps.** The PacBio-assembled contigs and BioNano-assembled genome maps were subjected to hybrid assembly by using the ‘HybridScaffold’ module of the IrysSolve as described previously (Sun *et al.*, 2018). Briefly, the PacBio genome maps were aligned to an in silico BspQI-digested cmap. The BioNano genome maps were then aligned to the PacBio genome maps with RefAligner, followed by identifying and resolving the conflict points. After resolving the conflict points, Bionano genome maps and PacBio genome maps were merged to generate hybrid scaffold. The PacBio genome maps



1 were mapped to hybrid scaffolds again to identify overlaps. If the overlap between  
2 PacBio contigs and hybrid scaffold was longer than 1 kb and identity  $\geq 95\%$ , these  
3 two sequences were merged. Based on the alignment information, the super-scaffolds  
4 were built.

5 **Construction of pseudomolecules.** The A188 scaffolds were mapped to  
6 B73\_RefGen\_v4 genome using Bwa (version bwa-0.7.15,  
7 <http://bio-bwa.sourceforge.net/bwa.shtml>). The mapping rate of each scaffold mapped  
8 to each chromosome of B73 were calculated. The scaffolds with the highest mapping  
9 rate were kept to determine mapping to which B73 chromosome. The mapping file  
10 was further filtered according to the one-to-one correspondence, and the comparison  
11 noise was excluded. The remaining mapping results were submitted to combining  
12 coordinate to determine the alignment of scaffold on the B73 chromosome. Reverse  
13 alignments of the scaffolds were also performed based on the filtered mapping result  
14 file, and finally the scaffolds were anchored to the B73 reference genome according  
15 to the filtered position alignment information.

16 **Assembly evaluation.** BUSCO (Benchmarking Universal Single-Copy Orthologs:  
17 <http://busco.ezlab.org/>) combined with tblastn, augustus, and hmmer softwares were  
18 used to evaluate the genome-assembly completeness. ‘Embryophyta\_odb9’ that  
19 contained 1,440 single-copy orthologous genes was used as a searching dataset and  
20 was employed to assess the assembly completeness of the A188 genome.

21 **Repetitive elements prediction.**

22 TRF v4.07b (<http://tandem.bu.edu/trf/trf407b.linux64.download.html>) was used to

1 predict tandem repeat. LTR Finder (Xu *et al.*, 2010), RepeatScout (v1.0.5,  
2 <http://www.repeatmasker.org>), and PILER (v1.0, <http://www.drive5.com/piler>) were  
3 used to predict LTR element, LINE, SINE, and transposable DNA, respectively. First  
4 of all, the low complexity and low copy results of RepeatScout and PILER were  
5 removed. The predicted repetitive element sequences longer than 100 bp and the gap  
6 length  $\leq 5\%$  were kept and further mapped to protein sequences in SwissProt  
7 ([ftp://ftp.ebi.ac.uk/pub/databases/uniprot/knowledgebase/uniprot\\_sprot.fasta.gz](ftp://ftp.ebi.ac.uk/pub/databases/uniprot/knowledgebase/uniprot_sprot.fasta.gz)), the  
8 sequence alignments with non-transposable element protein sequences with  $\text{evalue} \leq$   
9  $1e^{-4}$ , identity  $\geq 30$ , coverage  $\geq 30\%$ , and length  $\geq 90$  bp were removed. Then the  
10 remained sequences were aligned to Rfam 11.0 database  
11 (<ftp://ftp.ebi.ac.uk/pub/databases/Rfam>) using BLASTN to remove ncRNA, and the  
12 predicted repetitive elements with  $\text{evalue} \leq 1e^{-10}$ , identity  $\geq 80$ , and coverage  $\geq 50\%$   
13 were removed. Moreover, the remained repetitive elements were aligned to RepBase  
14 and TE protein database using WU-BLAST, and were classified using  
15 RepeatClassifier, with the known simple repeat, satellite, and ncRNA sequences  
16 removed. The remained repetitive elements were compared to each other using  
17 BLASTN, the sequences with  $\text{evalue} \leq 1e^{-10}$ , identity  $\geq 80$ , coverage  $\geq 80\%$ , and  
18 mapping length  $\geq 80$  bp were removed. Finally, the interspersed repeats were  
19 generated by masking predicted repetitive elements, known repetitive elements  
20 (RepBase), and protein repeat sequence (TE protein database) using RepeatMasker,  
21 RepeatMasker, and RepeatProteinMask, respectively.

## 22 Gene annotation

1 MAKER2 (<http://www.yandell-lab.org/software/maker.html>) (Cantarel *et al.*, 2008)  
2 was used to annotate genes in the A188 genome with the strategy as described  
3 previously (Sun *et al.*, 2018). First, for protein-homology-based prediction, we  
4 downloaded the proteins of B73 reference genome, Mo17 reference genome, and  
5 W22 reference genome from gramene (<http://gramene.org/>) (Tello-Ruiz *et al.*, 2015)  
6 as input of MAKER2. The A188 transcripts assembled from five different tissues  
7 based on single-molecule long-read sequencing in this study, B73 full-length  
8 transcripts from Iso-seq (Wang *et al.*, 2016), and Mo17 transcripts (Sun *et al.*, 2018)  
9 were used for gene transcript prediction. Second, the generated gene models were  
10 submitted to Augustus (Keller *et al.*, 2011), SNAP  
11 (<http://snap.stanford.edu/snap/download.html>), GeneMark-ESSuite (version 4.32  
12 [http://topaz.gatech.edu/GeneMark/license\\_download.cgi](http://topaz.gatech.edu/GeneMark/license_download.cgi)), and Glimmerhmm  
13 (<http://ccb.jhu.edu/software/glimmerhmm/>) ab initio prediction softwares to further *de*  
14 *novo* predict gene models. Then, we further filtered the preliminary prediction gene  
15 set according to AED scores generated in MAKER software and the high confidence  
16 gene models generated finally.

# 17 **Identification of PAV sequences.**

18 To identify presence/absence-variation sequences (PAV, length longer than 500bp),  
19 we used a sliding-window method as reported previously (Sun *et al.*, 2018). To  
20 identify A188-specific PAV sequences to B73, the A188 genome was divided into  
21 500 bp windows with a step size of 100 bp. Then all of the 500 bp windows were  
22 aligned to B73 genome with BWA mem (Li, 2013) ([http://bio- bwa.sourceforge.net/](http://bio-bwa.sourceforge.net/))

1 with options ‘-w 500 -M’. The A188-sepecific PAV sequences are the sequences that  
 2 cannot be aligned to the B73 genome or the primary alignment coverage less than 25%  
 3 (Sun *et al.*, 2018). Two overlapped PAV windows were merged. The same method  
 4 was used to identify A188-specific PAV sequences to Mo17 and to W22,  
 5 B73-specific PAV sequences to A188, Mo17-specific PAV sequences to A188, and  
 6 W22-specific PAV sequences to A188. The PAV sequences within 100 kb of the  
 7 physical coordinates were further merged. The merged region had more than 10%  
 8 PAV sequences were defined as a PAV cluster. Finally, all of the PAVs were  
 9 anchored back to corresponding genome. We used the same method (Sun *et al.*, 2018)  
 10 to identify A188-specific genes to B73, Mo17 and W22, respectively. In brief, the  
 11 genes with more than 75% of the CDS regions falling in PAV sequences were defined  
 12 as PAV genes.

### 13 **Comparative genomic analysis among A188, B73, Mo17 and W22.**

14 The Mummer software (Kurtz *et al.*, 2004) was used to perform comparative genomic  
 15 analysis between A188 and B73 genomes. Each A188 pseudo-chromosome sequence  
 16 was mapped to the corresponding B73 chromosome using mummer with the  
 17 parameters “nucmer -g 1000 -c 90 -l 40”. The mapping results were submitted to  
 18 delta-filter to perform noise filtration with parameters “-r -q”. The show-coords was  
 19 used for conversion of aligned physical coordinates with parameters “-rclTH”. SNPs  
 20 and small InDels (<100 bp) were identified using show-snps with “-ClrTH”.  
 21 Show-diff was employed to obtain Inversions with the default parameters. Finally, we  
 22 further filtered the alignments with aligned physical positions in one genome that

1 were located more than 10 Mb away in another genome. The comparative genomic  
2 analysis between A188 and Mo17, A188 and W22 genomes were processed with the  
3 same method.

## 4 **Results**

### 5 **Remarkable phenotypic difference between A188 and the other** 6 **assembled lines**

7 As a public inbred line, A188 has an outstanding response to the tissue culture,  
8 generating an approximate 100% efficiency in forming EC from immature embryos  
9 (Hodges *et al.*, 1986; Ishida *et al.*, 1996). However, previous studies demonstrated  
10 that B73 and Mo17 both have a very low frequency of inducing EC under standard  
11 conditions (Frame *et al.*, 2006; Salvo *et al.*, 2018). We also compared the phenotype  
12 of EC formation ratio among A188, B73, Mo17 and W22, indicating the highest EC  
13 induction ratio of A188 and the low EC induction ratios of the other three lines (Table  
14 1). Moreover, the other agronomic traits show significant difference between A188  
15 and the other lines including plant height, tassel branch numbers, ear numbers, protein  
16 concentration, days to tassel, days to pollination, and days to silk (Table 1 and Fig. 1).  
17 Our findings were in agreement with the previous studies about the phenotypic  
18 performances of A188 (Cook *et al.*, 2011; Peiffer *et al.*, 2014), implicating that  
19 A188/B73, A188/Mo17 and A188/W22 are therefore the ideal pairs of maize lines in  
20 genetic and molecular studies of these traits.

### 21 **Genome sequencing and *de novo* assembly**

22 By combining with optical genome mapping with the BioNano Genomics Irys System,

1 PacBio Sequel platform was used to sequence and *de novo* assemble of the A188  
2 genome. Firstly, over 104-fold coverage of sequence data (224.03 Gb in total)  
3 generated from PacBio Sequel technology was used to perform initial assembly,  
4 resulting in a 2127.72 Mb assembly with a contig N50 size of 1.06 Mb and the  
5 longest contig of 4.97 Mb (Table 2, Tables S1 and S2). We then used 631.48-Gb  
6 BioNano molecule (287-fold-coverage BioNano optical map) to scaffold the  
7 assembled contigs and generated the final assembly which contains 4,469 scaffolds  
8 with a scaffold N50 size of 11.61 Mb and the longest length of 47.84 Mb (Table 2 and  
9 Tables S1 and S2). The total size of the final assembly was 2,207.74 Mb, similar to  
10 those of the B73 (2,106 Mb) (Jiao *et al.*, 2017), Mo17 (2,183 Mb) (Sun *et al.*, 2018)  
11 and SK (2,094 Mb) (Yang *et al.*, 2019) genomes (Table 2 and Table S2). Bwa-0.7.15  
12 was then used to anchor the A188 scaffolds to ten pseudo-chromosomes based on the  
13 B73 RefGen v4 genome according to the filtered position alignment information  
14 (Methods). Finally, 295 scaffolds were anchored and oriented onto ten chromosomes  
15 (2,084.35 Mb, 94.30% of the final genome assembly) and 3704 scaffolds failed to be  
16 mapped to chromosomes (5.70% of the final genome assembly) (Table S3). The final  
17 A188 assembly had 2,480 gaps (89.56 Mb in length), compared with 2,522 gaps in  
18 B73 and 238 gaps in SK genome (Yang *et al.*, 2019). BUSCO (Simão *et al.*, 2015)  
19 was used to evaluate the A188 genome assembly quality. Finally, 95.3% of complete  
20 single-copy BUSCOs could be aligned to the A188 final assembly, similar to those  
21 for the B73 (Jiao *et al.*, 2017), Mo17 (Sun *et al.*, 2018), W22 (Springer *et al.*, 2018)  
22 and SK (Yang *et al.*, 2019) genomes, indicating the near completeness of our

1 assembly (Table S4).

## 2 **Genome annotation**

3 A modified approach based on the annotation pipeline (Sun *et al.*, 2018) was  
 4 employed to analyze the transposable-element content of our A188 assembly. Finally,  
 5 approximately 80.70% of the A188 genome sequence were identified as  
 6 transposable-element sequences, including retrotransposons (71.93%), DNA  
 7 transposons (5.91%), and unclassified elements (2.49%) (Table S5), which was lower  
 8 than those in B73 (Jiao *et al.*, 2017), Mo17 (Sun *et al.*, 2018), W22 (Springer *et al.*,  
 9 2018), SK (Yang *et al.*, 2019) and K0326Y (Li *et al.*, 2020) genomes. For  
 10 retrotransposons, the families of *Copia* and *Gypsy* represented 24.01% and 46.92% of  
 11 the A188 genome, respectively (Table S5). For DNA transposons, the family of *hAT*  
 12 was much lower than those in the B73 (Jiao *et al.*, 2017) and Mo17 (Sun *et al.*, 2018)  
 13 genomes.

14 To annotate the A188 genes, we integrated two technologies,  
 15 protein-homology-based prediction and isoform sequencing of five different A188  
 16 tissues, and combined the reported B73 full-length transcripts (Wang *et al.*, 2016) and  
 17 Mo17 transcripts (Sun *et al.*, 2018). In total, 44,653 high-confidence protein-coding  
 18 gene models with 66,359 transcripts were predicted (Table S6). Among them, 10,965  
 19 (24.56% of the predicted genes) and 16,243 (36.38% of the predicted genes) genes  
 20 were supported by ISO-seq with CDS coverage >90% and >50%, respectively (Table  
 21 S6). In total, 41,715 (93.42%) of the predicted A188 genes were mapped to ten  
 22 pseudo-chromosomes (Table S3). In addition, 93.52% (62,058) of these transcripts

were functionally annotated and deposited in the public databases (Fig. S1).

## **Genome structural variations between A188, B73, Mo17 and W22**

To better understand the genome difference, we individually aligned the pseudo-chromosomes of B73, Mo17 and W22 to those of A188. In total, 62.50% (1,316.38 Mb), 63.10% (1,327.82 Mb) and 62.59% (1,327.48 Mb) of the B73, Mo17 and W22 genome sequences matched in one-to-one syntenic blocks with 63.16% (1,316.45 Mb), 63.71% (1,328.03 Mb), and 63.69% (1,327.43 Mb) of the A188 genome sequence, respectively (Fig. 2, Fig. S2, and Table S7).

A total of 9,865,320 SNPs, 634,693 insertions and 654,322 deletions were identified between A188 and B73, with an average of 4.73 SNPs, 0.30 insertions and 0.31 deletions per kilobase (Fig. 2, Fig. S3, and Table S7). We also identified 9,490,058 SNPs, 743,829 insertions and 654,841 deletions between A188 and Mo17, and 9,614,783 SNPs, 600,755 insertions and 628,504 deletions between A188 and W22 (Fig. S3, Table S7). Less than 2.5% of these variations in A188 are allocated in CDS regions, and the remainders are annotated as intergenic variations (Table 3 and Table S8). Interestingly, a genome-wide comparison showed that InDels of  $3N \pm 1$  bp in CDS region were more abundant than 3N bp in gene coding regions (Table 3), between A188 and any one of lines B73, Mo17 and W22. We then focused on identifying presence/absence-variation sequences (PAV) longer than 500 bp in the A188 genome. By comparing the A188 and B73 genomes, we identified 27,240 A188-specific genomic segments (16.92 Mb in total) and 28,558 B73-specific genomic segments (17.76 Mb in total). Most of these PAV segments were shorter



1 than 3 kb, only 1 and 2 PAV segments were identified longer than 3 kb in A188 and  
2 B73, respectively (Fig. S4). Similarly, by comparing the A188 and Mo17 genomes,  
3 we identified 26,983 A188-specific genomic segments (16.76 Mb in total), and  
4 28,030 Mo17-specific genomic segments (17.44 Mb in total). Most of the PAV  
5 segments were shorter than 3 kb, only 1 and 3 PAV segments were identified longer  
6 than 3 kb in A188 and Mo17, respectively (Fig. S4). The comparison of the A188 and  
7 W22 genomes identified 31,536 A188-specific genomic segments (19.42 Mb in total),  
8 and 29,192 W22-specific genomic segments (17.98 Mb in total), with 1 and 4 PAV  
9 segments longer than 3 kb in A188 and W22, respectively (Fig. S4). According to the  
10 criterion that a gene with  $\geq 75\%$  of coding sequences covered by a PAV sequence can  
11 be identified as a PAV gene (Sun *et al.*, 2018), we identified 100 A188-specific and  
12 104 B73-specific PAV genes, by comparison of A188 and B73 genomes. Similarly,  
13 116 A188-specific and 146 Mo17-specific PAV genes were found by comparing  
14 A188 and Mo17, and 112 A188-specific and 116 W22-specific PAV genes were  
15 identified between A188 and W22 (Table 3 and Table S9). Combined these findings  
16 illustrated that the A188 genome showed huge variations from B73, Mo17 and W22  
17 genomes. However, only 9 A188-specific PAV genes were simultaneously identified  
18 in comparison with the other three inbred lines, thus illustrating that most of the  
19 A188-specific PAV genes have already existed in other lines (Table S9).

## 20 **Gene structural variations**

21 A total of 20,557, 21,007 and 20,713 genes displayed no variations in the CDS  
22 regions between B73 and A188, Mo17 and A188, and W22 and A188, respectively

(Table 3). Moreover, 17,168, 17,634 and 17,382 A188 genes showed no variations in CDS and intron regions as compared with B73, Mo17 and W22, respectively (Table 3). In particular, as compared with B73, Mo17 and W22, 8,647, 9,054 and 8,854 genes were highly conserved without any genetic variation (including 2 kb upstream and downstream), respectively (Table 3). Moreover, we found 23,989, 24,424 and 20,860 A188 genes showed synonymous variations in CDS compared to B73, Mo17, and W22, respectively (Table 3). Compared with B73, 22,958, 21,975 and 7,210 genes in A188 resulted in amino acid changes, missense mutation and non-frameshift InDels, respectively (Table 3). Mapped to Mo17, 23,313, 21,601 and 7,257 genes in A188 were identified to contain amino acid changes, missense mutation in CDS and non-frameshift InDels, respectively (Table 3). Aligned to W22, 23,070, 21,869 and 7,295 A188 genes showed amino acid changes, missense mutation in CDS and non-frameshift InDels, respectively (Table 3). All of these genes were classified as structurally conserved genes between A188 and the other lines, which accounted for  $\geq$  68.61% of the annotated A188 genes and may function in basic physiological effects.

By comparing B73 and A188 genomes, we identified 737, 506, 841, 1,671, 10,834 and 2,362 genes in A188 that generated start codon mutations, stop codon mutations, splice donor mutations, splice acceptor mutations, frameshift InDel in CDS and premature termination codon mutations, respectively (Table 3). Similarly, 747, 504, 801, 1,559, 10,982 and 2,355 genes in A188 led to start codon mutations, stop codon mutations, splice donor mutations, splice acceptor mutations, frameshift InDels in CDS and premature termination codon mutations, respectively, as compared with

Mo17 (Table 3). As well, 742, 506, 811, 1,486, 10,889 and 2,389 genes in A188 showed start codon mutations, stop codon mutations, splice donor mutations, splice acceptor mutations, frameshift InDels in CDS and premature termination codon mutations, as compared with W22, respectively (Table 3). In addition, 204, 262 and 228 PAV genes were identified between A188 and the lines B73, Mo17 and W22 genomes, respectively (Table 3). Finally, a total of 13,224 (29.62 %), 13,306 (29.80 %) and 13,167 (29.49 %) A188 genes had large structural variations (start- or stop-codon mutations, splice-donor or splice-acceptor mutations, frameshift mutations, premature termination codon mutations or PAV variations) as compared with B73, Mo17 and W22 genomes, respectively.

### **A188 genome-based genetic dissection of tissue culture response**

Recently, by using the F<sub>3:4</sub> population derived from B73 and WCIC2 (a near isogenic line of B73 containing several A188 segments), a locus associated with embryogenic and regenerative capabilities of immature embryo was fine-mapped within a 3.06 M region (chr3:178772856-181826658) based on the B73 reference genome, suggesting that the genes harbored by the A188 segment caused the high callus formation ratio (Salvo *et al.*, 2018).

To explore the candidate genes of embryonic callus induction, we aligned the 3.06 M B73 segment to the A188 genome and revealed a 3.89 M syntenic segment (Fig. 3) in A188. Within the 3.89 M segment, 51, 57, and 57 A188 genes were identified syntenic to B73, Mo17 and W22 syntenic segment, respectively (Table S10). Among them, 6, 14, and 6 genes showed large structural variation (LSV:

1 premature termination codon, stop codon loss, frameshift deletion, or frameshift  
2 insertion) relative to B73, Mo17 and W22, respectively (Table S11), and 4 LSV genes  
3 in A188 were simultaneously identified in comparison with the other 3 lines (Table  
4 4).

5 We also focused on the nonsyntenic genes of A188 in the QTL. Finally, we  
6 identified 48, 42, and 42 A188 genes in the QTL interval that were identified  
7 nonsyntenic, as compared with B73, Mo17 and W22 genomes, respectively (Table  
8 S10). To further identify whether the nonsyntenic genes have homologues in other  
9 sites of the 3 inbred lines, we mapped these nonsyntenic genes to the B73, MO17 and  
10 W22 whole genomes. Finally, 28, 11, and 24 A188 nonsyntenic genes showed LSV to  
11 their corresponding homologues in B73, Mo17 and W22, respectively (Table S11),  
12 and 4 LSV genes in A188 were simultaneously identified in comparison with the  
13 other 3 inbred lines (Table 4).

14 Moreover, previous studies have demonstrated that changes in gene expression  
15 can be induced during somatic embryogenesis to respond to tissue culture process (Ge  
16 *et al.*, 2017; Salvo *et al.*, 2018; Shen *et al.*, 2012; Zhang *et al.*, 2014). Based on the  
17 reported transcriptome data of A188 (Zhang *et al.*, 2014), four of the 99 A188 genes  
18 within the mapped QTL were regulated by more than 8 folds in different stages of  
19 immature embryo culture, relative to control. Collectively, the 4 syntenic genes with  
20 LSV, the 4 nonsyntenic genes with LSV as well as the 4 differentially expressed  
21 genes were designated as the candidate genes responsible for tissue culture capability  
22 of A188 immature embryo in this study (Table 4).

# 1 Discussion

2 Although A188 is limited from the application in breeding programs, due to its poor  
 3 agronomic traits, A188 shows significant phenotypic variations from B73, Mo17 and  
 4 W22, including plant height, tassel branch number, ear number, protein concentration,  
 5 days to tassel, days to silk etc., especially EC induction ratio (Table 1). The  
 6 phenotypic performance is determined by the combination of genotype and  
 7 environment. To better understand the mechanisms underlying the phenotypic  
 8 difference between A188, B73, Mo17 and W22, we sequenced and *de novo*  
 9 assembled the A188 genome. Finally, we assembled the A188 genome into 2,207.74  
 10 Mb with a scaffold N50 size of 11.61 Mb (Table 2, Table S2). As expected, A188  
 11 showed large genomic variations as compared with B73, Mo17 and W22 (Fig. 2,  
 12 Table 3, Tables S7, S8 and S9). Our new A188 genome provides a good resource to  
 13 map causal genes controlling these various traits. We also identified a number of  
 14 A188 genes presenting structure variations relative to other 3 inbred lines, such as  
 15 genes with start/stop codon mutations, splice donor/acceptor mutations and frameshift  
 16 InDels, which provides a novel view to study gene function and evolutionary analysis.

17 EC induction from maize immature embryo is highly dependent on genotype,  
 18 which resulted in only a few functional genes identified. Accordingly, the molecular  
 19 mechanism underlying EC induction still remains unclear in maize. Combined our  
 20 new A188 genome, previously reported QTLs, and RNA sequencing data, we  
 21 successfully identified 12 candidate genes responsible for maize tissue culture  
 22 response (Table 4). These candidate genes provide new insight into understanding the

1 molecular mechanisms of maize tissue culture response, and provide new gene  
2 resources for improving maize embryonic callus induction and maize genetic  
3 transformation, which will further contribute to gene function revelation and  
4 transgenic breeding in maize. Especially, ZmY09GFa037173 showed a premature  
5 termination mutation in A188, which was annotated as an Ankyrin repeat-containing  
6 protein and involved in signal transduction. In addition, the *Arabidopsis* homologue,  
7 *Itm1*, was previously reported to regulate ROS accumulation under salt-stress through  
8 regulating ABA signaling pathways (Sakamoto *et al.*, 2008), which suggest that  
9 ZmY09GFa037173 have a potential to induce maize callus formation by mediating  
10 ROS levels.

11 Owing to the vast genetic diversity among maize germplasms, the currently  
12 identified genetic variants by comparison of nine public maize genomes are still  
13 unsaturated (Yang *et al.*, 2019). The previously study suggest that more than 20  
14 reference genomes of maize and teosinte were required for performing pan-genome  
15 construction, which will provide better coverage for genetic variations of the *Zea*  
16 *genus* (Yang *et al.*, 2019). Our new sequenced and assembled A188 genome thereby  
17 provides a new reference genome and structure variation resource.

## 18 **Supplementary data**

19 **Fig. S1.** Code gene function annotation result using the public databases of NR,  
20 Swiss-Prot, eggNOG, GO and KEGG.

21 **Fig. S2.** Whole-genome comparison of A188 versus B73 and Mo17. Grey lines  
22 represent the one-to-one aligned genes between each pair of pseudomolecules.

- 1    **Fig. S3.** Histogram of InDel number comparisons of A188 versus B73 and Mo17 of
- 2    the whole genome and coding regions.
- 3    **Fig. S4.** Length distribution of PAV sequences between A188 and B73 genomes (a),
- 4    A188 and Mo17 genomes (b), A188 and W22 genomes (c).
- 5    **Table S1.** Summary of sequencing data of A188 genome.
- 6    **Table S2.** Details of the A188 genome assembly.
- 7    **Table S3.** Details of the 10 A188 pseudo-chromosomes.
- 8    **Table S4.** BUSCO analysis.
- 9    **Table S5.** Comparisons of repetitive elements between A188, B73 and Mo17.
- 10    **Table S6.** Statistics of A188, B73 and Mo17 gene models.
- 11    **Table S7.** Summary of aligned sequences, SNPs and InDels in A188, B73, Mo17 and
- 12    W22 genomes.
- 13    **Table S8.** Genome distribution of SNPs and InDels between A188, B73, Mo17 and
- 14    W22 genomes.
- 15    **Table S9.** Summary of PAV genes in A188, B73, Mo17 and W22 genomes.
- 16    **Table S10.** Syntenic analysis of the 99 genes on the A188 syntenic segment
- 17    compared with B73, Mo17 and W22 syntenic segments.
- 18    **Table S11.** Mutation type of the 99 genes within the QTL on the A188 syntenic
- 19    segment compared with B73, Mo17 and W22 homologous genes.
- 20    **Acknowledgements**
- 21    This study was supported by the National Natural Science Foundation of China
- 22    (31871637 and 32072073), and the Project of Transgenic New Variety Cultivation

1 (2016ZX08003003).

## 2 **Author contributions**

3 Y.S., F.G. and L.M. designed the research. J.Q., P.L. and J.H. performed genome  
4 assembly, genome annotation and genome comparison. F.G. L.P. and J.H. prepared  
5 DNA/RNA samples and constructed the next-generation-sequencing library. P.L.  
6 performed phenotype investigation. Y.S., F.G., L.M., J.Q., P.L., L.P., J.H., C.Z., G.Y.,  
7 C.Y., S.G., and G.P. participated in the analysis. F.G. J.Q., P.L., L.P., L.M. and Y.S.  
8 wrote and revised the manuscript.

## 9 **Data Availability**

10 All datasets reported in this study have been deposited in GenBank (NCBI) with the  
11 following accession IDs: Genome assembly, JADZIA0000000000; Raw data for  
12 genome assembly and gene annotation, PRJNA678284.

## 13 **Conflict of Interest Statement**

14 The authors declare no conflict of interests.

## **Reference**

**Armstrong C, Romero-Severson J, Hodges T.** 1992. Improved tissue culture response of an elite maize inbred through backcross breeding, and identification of chromosomal regions important for regeneration by RFLP analysis. Theoretical and applied genetics **84**, 755-762.

**Bronsema F, Van Oostveen W, Van Lammeren A.** 1997. Comparative analysis of callus formation and regeneration on cultured immature maize embryos of the inbred lines A188 and A632. Plant cell, tissue and organ culture **50**, 57-65.

**Brown PJ, Upadaya N, Mahone GS, Tian F, Bradbury PJ, Myles S, Holland JB, Flint-Garcia S, McMullen MD, Buckler ES.** 2011. Distinct genetic architectures for male and female inflorescence traits of maize. PLoS genetics **7**, e1002383.



- Buckler ES, Gaut BS, McMullen MD.** 2006. Molecular and functional diversity of maize. *Current opinion in plant biology* **9**, 172-176.
- Cantarel BL, Korf I, Robb SM, Parra G, Ross E, Moore B, Holt C, Alvarado AS, Yandell M.** 2008. MAKER: an easy-to-use annotation pipeline designed for emerging model organism genomes. *Genome research* **18**, 188-196.
- Chaisson MJ, Tesler G.** 2012. Mapping single molecule sequencing reads using basic local alignment with successive refinement (BLASR): application and theory. *BMC Bioinformatics* **13**, 238.
- Cook JP, McMullen MD, Holland JB, Tian F, Bradbury P, Ross-Ibarra J, Buckler ES, Flint-Garcia SA.** 2011. Genetic architecture of maize kernel composition in the nested association mapping and inbred association panels. *Plant physiology*, pp. 111.185033.
- Frame BR, McMurray JM, Fonger TM, Main ML, Taylor KW, Torney FJ, Paz MM, Wang K.** 2006. Improved Agrobacterium-mediated transformation of three maize inbred lines using MS salts. *Plant cell reports* **25**, 1024-1034.
- Frame BR, Shou H, Chikwamba RK, Zhang Z, Xiang C, Fonger TM, Pegg SEK, Li B, Nettleton DS, Pei D, Wang K.** 2002. Agrobacterium tumefaciens-Mediated Transformation of Maize Embryos Using a Standard Binary Vector System. *Plant physiology* **129**, 13-22.
- Gacheri P, Machuka J, Ombori O, Bukachi B.** 2015. Agrobacterium mediated transformation of selected maize inbred lines with pPZP200 towards enhancement of lysine and methionine content. *Journal of Biology, Agriculture and Healthcare* **5**.
- Ge F, Hu H, Huang X, Zhang Y, Wang Y, Li Z, Zou C, Peng H, Li L, Gao S.** 2017. Metabolomic and Proteomic Analysis of Maize Embryonic Callus induced from immature embryo. *Scientific Reports* **7**, 1004.
- Green C, Phillips R.** 1975. Plant Regeneration from Tissue Cultures of Maize 1. *Crop Science* **15**, 417-421.
- Hodges T, Kamo K, Imbrie C, Becwar M.** 1986. Genotype specificity of somatic embryogenesis and regeneration in maize. *Bio/technology* **4**, 219-223.
- Ishida Y, Saito H, Ohta S, Hiei Y, Komari T, Kumashiro T.** 1996. High efficiency transformation of maize (*Zea mays* L.) mediated by Agrobacterium tumefaciens. *Nature Biotechnology* **14**, 745-750.
- Jiao Y, Peluso P, Shi J, Liang T, Stitzer MC, Wang B, Campbell MS, Stein JC,**

- Wei X, Chin C-S, Guill K, Regulski M, Kumari S, Olson A, Gent J, Schneider KL, Wolfgruber TK, May MR, Springer NM, Antoniou E, McCombie WR, Presting GG, McMullen M, Ross-Ibarra J, Dawe RK, Hastie A, Rank DR, Ware D.** 2017. Improved maize reference genome with single-molecule technologies. *Nature* **546**, 524.
- Keller O, Kollmar M, Stanke M, Waack S.** 2011. A novel hybrid gene prediction method employing protein multiple sequence alignments. *Bioinformatics* **27**, 757-763.
- Krakowsky M, Lee M, Garay L, Woodman-Clikeman W, Long M, Sharopova N, Frame B, Wang K.** 2006. Quantitative trait loci for callus initiation and totipotency in maize (*Zea mays* L.). *Theoretical and applied genetics* **113**, 821-830.
- Kurtz S, Phillippy A, Delcher AL, Smoot M, Shumway M, Antonescu C, Salzberg SL.** 2004. Versatile and open software for comparing large genomes. *Genome biology* **5**, R12.
- Lai J, Li R, Xu X, Jin W, Xu M, Zhao H, Xiang Z, Song W, Ying K, Zhang M.** 2010. Genome-wide patterns of genetic variation among elite maize inbred lines. *Nature genetics* **42**, 1027.
- Li C, Xiang X, Huang Y, Zhou Y, An D, Dong J, Zhao C, Liu H, Li Y, Wang Q, Du C, Messing J, Larkins BA, Wu Y, Wang W.** 2020. Long-read sequencing reveals genomic structural variations that underlie creation of quality protein maize. *Nature communications* **11**, 17.
- Li H.** 2013. Aligning sequence reads, clone sequences and assembly contigs with BWA-MEM. *arXiv preprint arXiv:1303.3997*.
- Lowe BA, Way MM, Kumpf JM, Rout J, Warner D, Johnson R, Armstrong CL, Spencer MT, Chomet PS.** 2006. Marker assisted breeding for transformability in maize. *Molecular Breeding* **18**, 229-239.
- Lowe K, Wu E, Wang N, Hoerster G, Hastings C, Cho MJ, Scelonge C, Lenderts B, Chamberlin M, Cushatt J, Wang L, Ryan L, Khan T, Chow-Yiu J, Hua W, Yu M, Banh J, Bao Z, Brink K, Igo E, Rudrappa B, Shamseer PM, Bruce W, Newman L, Shen B, Zheng P, Bidney D, Falco C, Register J, Zhao ZY, Xu D, Jones T, Gordon-Kamm W.** 2016. Morphogenic Regulators Baby boom and Wuschel Improve Monocot Transformation. *Plant Cell* **28**, 1998-2015.
- Pan G, Zhang Z, Wei X, Song Y, Zhao M, Xia Y, Rong T.** 2006. QTL analysis of maize (*Zea mays* L.) embryo culturing capacity. *Zuo wu xue bao* **32**, 7-13.

- Peiffer JA, Romay MC, Gore MA, Flint-Garcia SA, Zhang Z, Millard MJ, Gardner CA, McMullen MD, Holland JB, Bradbury PJ.** 2014. The genetic architecture of maize height. *Genetics* **196**, 1337-1356.
- Pendleton M, Sebra R, Pang AWC, Ummat A, Franzen O, Rausch T, Stütz AM, Stedman W, Anantharaman T, Hastie A, Dai H, Fritz MH-Y, Cao H, Cohain A, Deikus G, Durrett RE, Blanchard SC, Altman R, Chin C-S, Guo Y, Paxinos EE, Korbel JO, Darnell RB, McCombie WR, Kwok P-Y, Mason CE, Schadt EE, Bashir A.** 2015. Assembly and diploid architecture of an individual human genome via single-molecule technologies. *Nature Methods* **12**, 780.
- Sakamoto H, Matsuda O, Iba K.** 2008. ITN1, a novel gene encoding an ankyrin-repeat protein that affects the ABA-mediated production of reactive oxygen species and is involved in salt-stress tolerance in *Arabidopsis thaliana*. *Plant J* **56**, 411-422.
- Salvo S, Cook J, Carlson AR, Hirsch CN, Kaeppler SM, Kaeppler HF.** 2018. Genetic Fine-Mapping of a Quantitative Trait Locus (QTL) Associated with Embryogenic Tissue Culture Response and Plant Regeneration Ability in Maize (*Zea mays* L.). *The Plant Genome*.
- Schnable PS, Ware D, Fulton RS, Stein JC, Wei F, Pasternak S, Liang C, Zhang J, Fulton L, Graves TA.** 2009. The B73 maize genome: complexity, diversity, and dynamics. *science* **326**, 1112-1115.
- Shen Y, Jiang Z, Yao X, Zhang Z, Lin H, Zhao M, Liu H, Peng H, Li S, Pan G.** 2012. Genome expression profile analysis of the immature maize embryo during dedifferentiation. *PLoS ONE* **7**.
- Simão FA, Waterhouse RM, Ioannidis P, Kriventseva EV, Zdobnov EM.** 2015. BUSCO: assessing genome assembly and annotation completeness with single-copy orthologs. *Bioinformatics* **31**, 3210-3212.
- Springer NM, Anderson SN, Andorf CM, Ahern KR, Bai F, Barad O, Barbazuk WB, Bass HW, Baruch K, Ben-Zvi G, Buckler ES, Bukowski R, Campbell MS, Cannon EKS, Chomet P, Dawe RK, Davenport R, Dooner HK, Du LH, Du C, Easterling KA, Gault C, Guan J-C, Hunter CT, Jander G, Jiao Y, Koch KE, Kol G, Köllner TG, Kudo T, Li Q, Lu F, Mayfield-Jones D, Mei W, McCarty DR, Noshay JM, Portwood JL, Ronen G, Settles AM, Shem-Tov D, Shi J, Soifer I, Stein JC, Stitzer MC, Suzuki M, Vera DL, Vollbrecht E, Vrebalov JT, Ware D,**

- Wei S, Wimalanathan K, Woodhouse MR, Xiong W, Brutnell TP.** 2018. The maize W22 genome provides a foundation for functional genomics and transposon biology. *Nature genetics* **50**, 1282-1288.
- Springer NM, Ying K, Fu Y, Ji T, Yeh C-T, Jia Y, Wu W, Richmond T, Kitzman J, Rosenbaum H.** 2009. Maize inbreds exhibit high levels of copy number variation (CNV) and presence/absence variation (PAV) in genome content. *PLoS genetics* **5**, e1000734.
- Sun S, Zhou Y, Chen J, Shi J, Zhao H, Zhao H, Song W, Zhang M, Cui Y, Dong X, Liu H, Ma X, Jiao Y, Wang B, Wei X, Stein JC, Glaubitz JC, Lu F, Yu G, Liang C, Fengler K, Li B, Rafalski A, Schnable PS, Ware DH, Buckler ES, Lai J.** 2018. Extensive intraspecific gene order and gene structural variations between Mo17 and other maize genomes. *Nat Genet* **50**, 1289-1295.
- Tello-Ruiz MK, Stein J, Wei S, Preece J, Olson A, Naithani S, Amarasinghe V, Dharmawardhana P, Jiao Y, Mulvaney J.** 2015. Gramene 2016: comparative plant genomics and pathway resources. *Nucleic acids research* **44**, D1133-D1140.
- Wang B, Tseng E, Regulski M, Clark TA, Hon T, Jiao Y, Lu Z, Olson A, Stein JC, Ware D.** 2016. Unveiling the complexity of the maize transcriptome by single-molecule long-read sequencing. *Nature communications* **7**, 11708.
- Xu L, Zhang Y, Su Y, Liu L, Yang J, Zhu Y, Li C.** 2010. Structure and evolution of full-length LTR retrotransposons in rice genome. *Plant systematics and evolution* **287**, 19-28.
- Yang N, Liu J, Gao Q, Gui S, Chen L, Yang L, Huang J, Deng T, Luo J, He L, Wang Y, Xu P, Peng Y, Shi Z, Lan L, Ma Z, Yang X, Zhang Q, Bai M, Li S, Li W, Liu L, Jackson D, Yan J.** 2019. Genome assembly of a tropical maize inbred line provides insights into structural variation and crop improvement. *Nature genetics* **51**, 1052-1059.
- Zhang X, Salvo SAGD, Hirsch CN, Buell CR, Kaeppler SM, Kaeppler HF.** 2014. Whole Transcriptome Profiling of Maize during Early Somatic Embryogenesis Reveals Altered Expression of Stress Factors and Embryogenesis-Related Genes. *PLoS ONE* **9**.

## Tables

**Table 1** The phenotypic performances of agronomic traits among different inbred lines

| Line | ECIR <sup>#</sup> | Sig. | Plant height* | Sig. | TBN*       | Sig. | Ear No.*  | Sig. | Pro con. <sup>#</sup> | Sig. | DtT | DtP | DtS |
|------|-------------------|------|---------------|------|------------|------|-----------|------|-----------------------|------|-----|-----|-----|
| A188 | 91.53%±5.55%      | a    | 126.00±16.83  | d    | 12.36±2.71 | a    | 1.38±0.62 | a    | 11.98±0.04            | b    | 51  | 59  | 61  |
| W22  | 1.67%±1.85        | c    | 159.50±17.03  | c    | 11.48±2.48 | a    | 1.29±0.60 | ab   | 10.48±0.07            | c    | 67  | 70  | 70  |
| Mo17 | 6.94%±1.39        | b    | 184.29±17.99  | b    | 6.21±1.05  | b    | 1.07±0.68 | bc   | 12.59±0.11            | a    | 70  | 71  | 72  |
| B73  | 0±0               | c    | 203.36±13.92  | a    | 6.64±1.23  | b    | 0.92±0.51 | c    | 9.34±0.05             | d    | 71  | 72  | 73  |

The results are shown as the means ± SD (“\*” n = 42, “#” n=3); “a, b, c, d” represents the significant

differences of trait with  $P < 0.05$ . ECIR: embryonic callus induction ratio; Sig.: significance; TBN:

Tassel branch numbers; Pro con.: protein concentration; DtT: Days to Tassel; DtP: Days to Pollination;

DtS: Days to Silk.

**Table 2** Global statistics for the A188 genome assembly

|                               | PacBio assembly | Pacbio+Bionano hybrid<br>assembly | Pseudomolecule |
|-------------------------------|-----------------|-----------------------------------|----------------|
| Total length of assembly (Mb) | 2,127.72        | 2,210.33                          | 2,084.35       |
| N50 size (Mb)                 | 1.06            | 11.61                             | -              |
| Longest length (Mb)           | 4.97            | 47.84                             | -              |
| Number of sequences           | 6,385           | 4,469                             | 10             |

**Table 3** Variations within genes between A188, B73, Mo17 and W22 genomes

| Variation type                                  | A188 to B73 | A188 to Mo17 | A188 to W22 |
|-------------------------------------------------|-------------|--------------|-------------|
| 1. Structurally conserved genes                 | 30635       | 31095        | 30764       |
| No DNA variation in CDS                         | 20557       | 21007        | 20713       |
| No DNA variation in CDS and intron              | 17168       | 17634        | 17382       |
| No DNA variation in genic region*               | 8647        | 9054         | 8854        |
| Without amino acid substitutions                | 23989       | 24424        | 20860       |
| With amino acid changes                         | 22958       | 23313        | 23070       |
| With missense mutation in CDS                   | 21975       | 21601        | 21869       |
| With 3N InDel in CDS                            | 7210        | 7257         | 7295        |
| 2. Genes with large structural mutations        | 13020       | 13044        | 12939       |
| Start codon mutation                            | 737         | 747          | 742         |
| Stop codon mutation                             | 506         | 504          | 506         |
| Splice donor mutation                           | 841         | 801          | 811         |
| Splice acceptor mutation                        | 1671        | 1559         | 1486        |
| With 3N±1 InDel in CDS                          | 10834       | 10982        | 10889       |
| Premature termination codon                     | 2362        | 2355         | 2389        |
| 3. PAV genes                                    | 204         | 262          | 228         |
| A188 present PAV genes                          | 100         | 116          | 112         |
| A188 absent PAV genes                           | 104         | 146          | 116         |
| Total of genes with large structural variations | 13224       | 13306        | 13167       |

\* Genic regions include the 2 kb upstream and downstream of the gene body.

**Table 4** Tissue culture response candidate genes

| A188 Gene ID    | B73 homologous | Mutation type to B73               | Mo17 homologous | mutation type to Mo17            | W22 homologous  | mutation type to W22               | Homologous type        | Annotation                                            |
|-----------------|----------------|------------------------------------|-----------------|----------------------------------|-----------------|------------------------------------|------------------------|-------------------------------------------------------|
| ZmY09GF a037173 | GRMZM2G 123977 | stop gain                          | Zm00014a0 19537 | stop gain                        | Zm00004b0 18533 | stop gain                          | syntenic gene          | ankyrin repeat-containing protein;signal transduction |
| ZmY09GF a037487 | GRMZM2G 359234 | frameshift deletion                | Zm00014a0 19543 | stoploss and frameshift deletion | Zm00004b0 18529 | frameshift deletion                | syntenic gene          | UDP-glucuronic acid decarboxylase                     |
| ZmY09GF a038636 | GRMZM2G 337905 | stop gain                          | Zm00014a0 19529 | stop gain                        | Zm00004b0 18516 | stop gain                          | syntenic gene          | helicase-like protein;DNA repair                      |
| ZmY09GF a039738 | GRMZM5G 856598 | stop gain                          | Zm00014a0 39033 | stop gain                        | Zm00004b0 18443 | stop gain                          | syntenic gene          | Probable anion transporter                            |
| ZmY09GF a035987 | GRMZM2G 341918 | frameshift insertion and stop gain | Zm00014a0 13928 | stop gain                        | Zm00004b0 00208 | frameshift insertion and stop gain | nonsyntenic homologous | zinc finger MYM-type protein 1-like                   |
| ZmY09GF a037580 | GRMZM2G 156296 | frameshift insertion and stop gain | Zm00014a0 10023 | frameshift insertion             | Zm00004b0 30624 | frameshift insertion and stop gain | nonsyntenic homologous | uncharacterized protein loc103635851                  |
| ZmY09GF a038110 | GRMZM2G 084717 | frameshift deletion                | Zm00014a0 20349 | frameshift deletion              | Zm00004b0 17917 | frameshift deletion                | nonsyntenic homologous | hypothetical protein                                  |
| ZmY09GF a038645 | GRMZM2G 078468 | stop gain                          | Zm00014a0 04443 | stop gain                        | Zm00004b0 21555 | frameshift deletion and stop gain  | nonsyntenic homologous | hypothetical protein                                  |

|                    |                      |                   |                    |                    |                    |                    |                                       |                                                                                                                                        |
|--------------------|----------------------|-------------------|--------------------|--------------------|--------------------|--------------------|---------------------------------------|----------------------------------------------------------------------------------------------------------------------------------------|
| ZmY09GF<br>a036216 | GRMZM2G<br>091445    | -                 | Zm00014a0<br>20366 | synonymo<br>us SNV | Zm00004b0<br>17905 | -                  | DE gene,<br>nonsyntenic<br>homologous | Defensin-like<br>protein                                                                                                               |
| ZmY09GF<br>a038775 | GRMZM2G<br>084779    | synonymous<br>SNV | Zm00014a0<br>20354 | synonymo<br>us SNV | Zm00004b0<br>17916 | -                  | DE gene,<br>nonsyntenic<br>homologous | potassium ion uptake<br>permease                                                                                                       |
| ZmY09GF<br>a036902 | AC209784.3<br>_FG007 | synonymous<br>SNV | Zm00014a0<br>19526 | synonymo<br>us SNV | Zm00004b0<br>18512 | synonymo<br>us SNV | DE gene,<br>syntenic<br>gene          | Probable mediator<br>of RNA polymerase<br>II transcription<br>subunit 37c; MAPK<br>signaling pathway;<br>Estrogen signaling<br>pathway |
| ZmY09GF<br>a039032 | GRMZM2G<br>065557    | -                 | Zm00014a0<br>36794 | -                  | Zm00004b0<br>18459 | -                  | DE gene,<br>syntenic<br>gene          | hypothetical protein                                                                                                                   |

DE gene: differentially expressed genes during tissue culture response.

## Figure Legends

**Fig. 1** Overview of the trait difference between A188, B73, Mo17 and W22 inbred lines, including plant height (**A**), ear trait (**B**), and kernel size (**C**).

**Fig. 2** Features of the A188 genome. **a**, Transposable-element density; **b**, gene density; **c**, **d** and **e**, numbers of PAVs (**c**), SNPs (**d**) and InDels (**e**) compared with B73 genome.

The sliding window is 1 Mb for all tracks.

**Fig. 3** Tissue culture response candidate loci. The 3.89 M A188 segment (QTL for maize tissue culture response) aligned to the syntenic segment of B73, Mo17 and W22 genomes. The red, green and blue lines indicate aligned A188 genes in the 3.89 M segment to the B73, Mo17 and W22, respectively.



## Figures

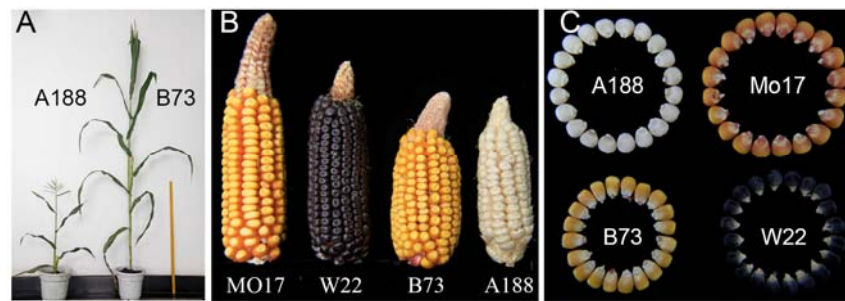

**Fig. 1** Overview of the trait difference between A188, B73, Mo17 and W22 inbred lines, including plant height (A), ear trait (B), and kernel size (C).

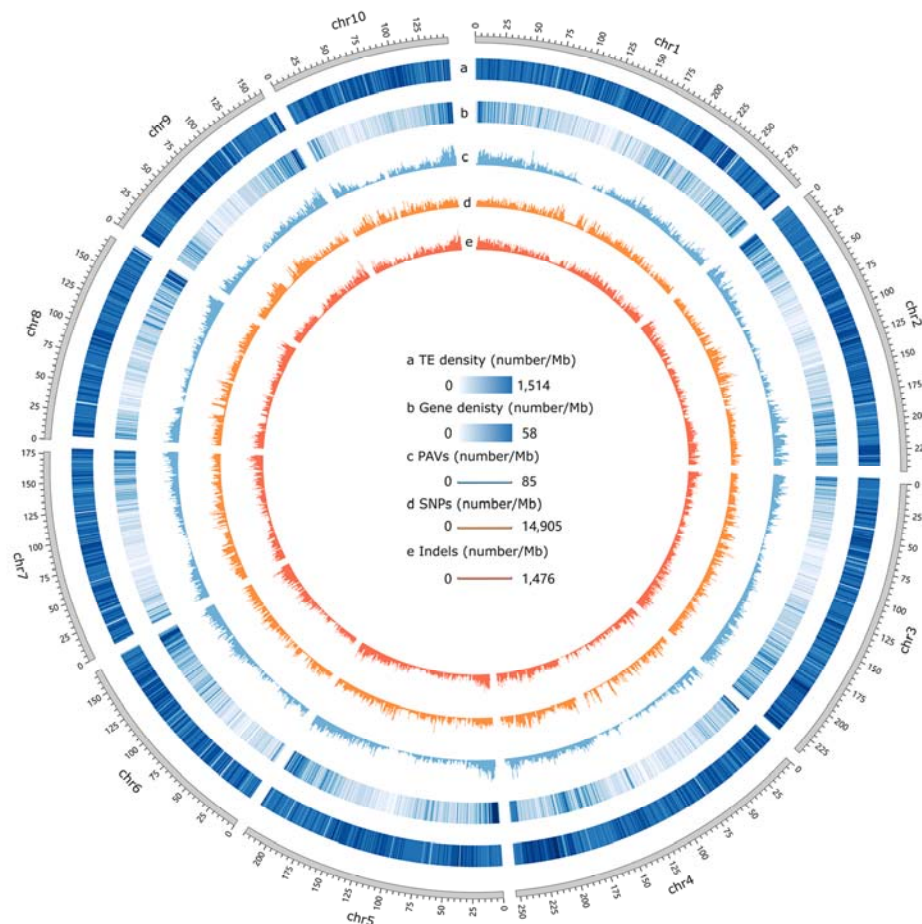

**Fig. 2** Features of the A188 genome. **a**, Transposable-element density; **b**, gene density; **c**, **d** and **e**, numbers of PAVs (c), SNPs (d) and Indels (e) compared with B73 genome.

The sliding window is 1 Mb for all tracks.

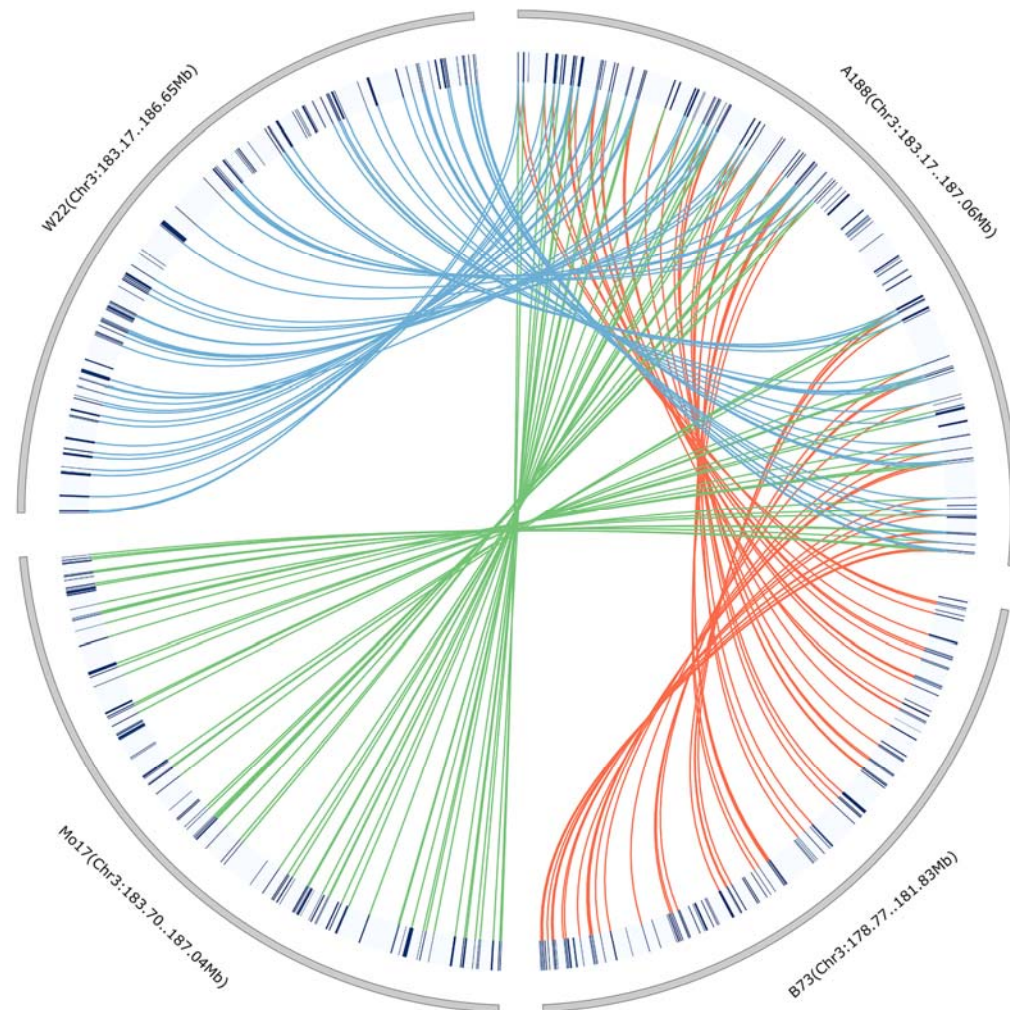

**Fig. 3** Tissue culture response candidate loci. The 3.89 M A188 segment (QTL for maize tissue culture response) aligned to the syntenic segment of B73, Mo17 and W22 genomes. The red, green and blue lines indicate aligned A188 genes in the 3.89 M segment to the B73, Mo17 and W22, respectively.

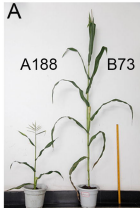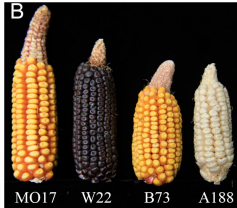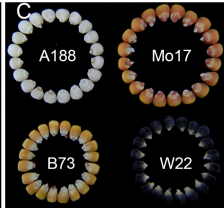

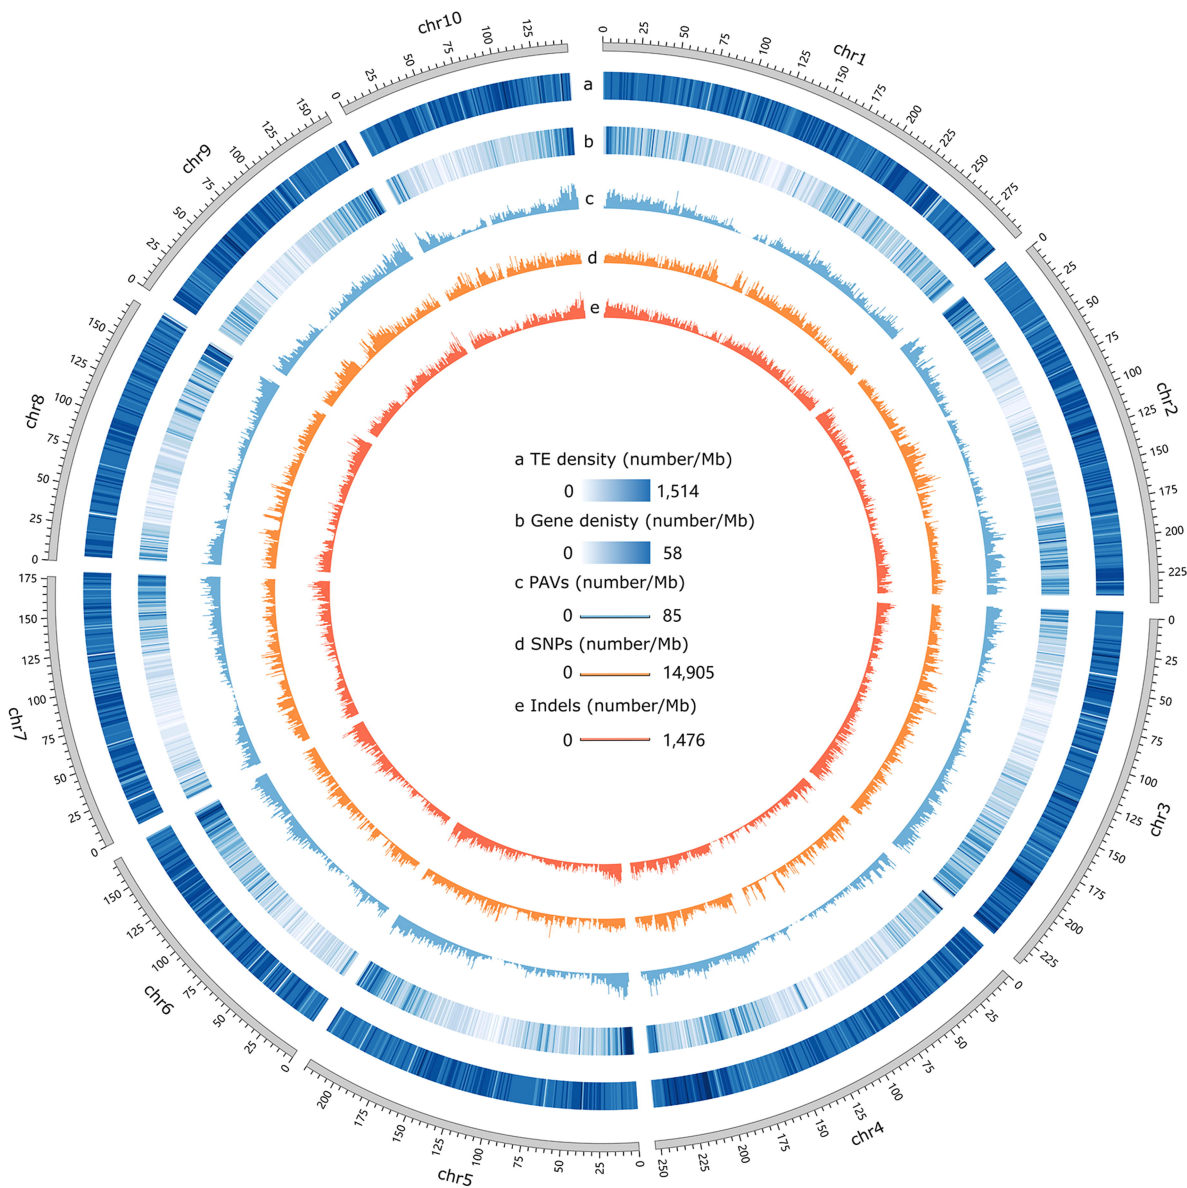

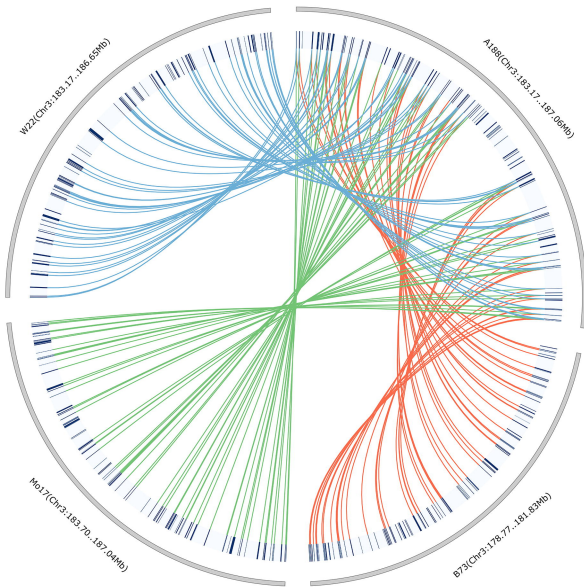

Source: https://www.biorxiv.org/content/10.1101/2021.03.15.435372v1.full.pdf
